# Supplementary material for: Co-overexpression of AXL and c-ABL predicts a poor prognosis in esophageal adenocarcinoma and promotes cancer cell survival
Source: PubMed Central journal article supplement (PMC7477426; doi:10.7150/jca.47318), 2020-08-08
Supplement: jcav11p5867s1.pdf [file jcav11p5867s1.pdf]

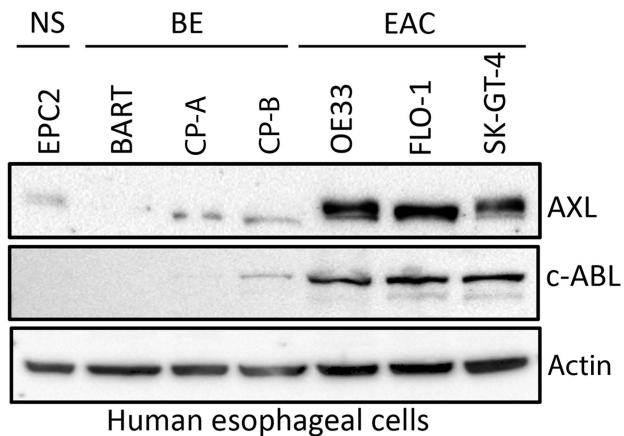

**Supplemental Figure S1. Co-overexpression of AXL and c-ABL proteins in esophageal adenocarcinoma cell lines.** Proteins from normal esophageal squamous epithelial cells (NS; EPC2), Barrett's cells (BE; BART, CP-A, and CP-B), and esophageal adenocarcinoma cells (EAC; OE33, FLO-1, and SK-GT-4) were subjected to Western blot analysis of AXL and c-ABL proteins.

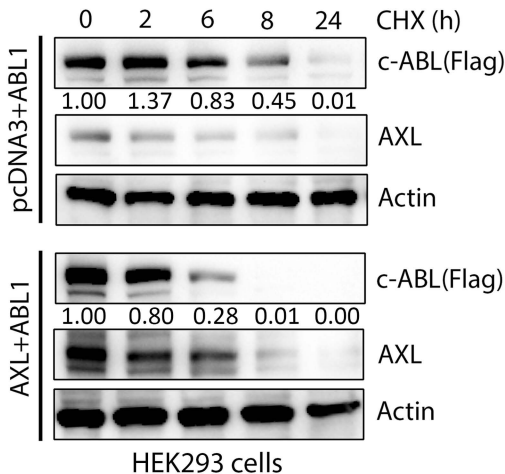

**Supplemental Figure S2. AXL expression does not enhance c-ABL protein stability.** HEK293 cells were transiently co-transfected with ABL1 and pcDNA3 or AXL and treated with CHX for the indicated timepoints. Western blot analysis was used to assess c-ABL protein levels. The data showed that c-ABL protein stability was not increased by AXL expression.

### Supplemental Table S1. Co-overexpression of AXL and c-ABL proteins in esophageal adenocarcinomas

|                   | N  | EAC<br><i>N</i> = 53 | Normal<br><i>N</i> = 11 | p-value             |
|-------------------|----|----------------------|-------------------------|---------------------|
| AXL index score   | 64 |                      |                         | <0.001 <sup>2</sup> |
| 0                 |    | 13% ( 7)             | 0% ( 0)                 |                     |
| 1                 |    | 21% (11)             | 64% ( 7)                |                     |
| 2                 |    | 11% ( 6)             | 36% ( 4)                |                     |
| 3                 |    | 55% (29)             | 0% ( 0)                 |                     |
| c-ABL index score | 64 |                      |                         | <0.001 <sup>2</sup> |
| 0                 |    | 6% ( 3)              | 45% ( 5)                |                     |
| 2                 |    | 8% ( 4)              | 27% ( 3)                |                     |
| 4                 |    | 21% (11)             | 27% ( 3)                |                     |
| 8                 |    | 26% (14)             | 0% ( 0)                 |                     |
| 12                |    | 40% (21)             | 0% ( 0)                 |                     |

N, the number of samples and numbers after proportions are frequencies. AXL (55%, IHC index score = 3) and c-ABL (66%, IHC index score ≥ 8) are frequently overexpressed in esophageal adenocarcinomas. 2, Pearson test was used to assess the differences in AXL and c-ABL index scores between normal and tumor tissue samples.

**Supplemental Table S2: descriptive patient characteristics**

|                   | N  |              |
|-------------------|----|--------------|
| Gender            | 53 |              |
| Female            |    | 11% ( 6)     |
| Male              |    | 89% (47)     |
| Age               | 53 | 56 63 70     |
| Age categories    | 53 | <i>a b c</i> |
| <60               |    | 36% (19)     |
| ≥60               |    | 64% (34)     |
| Race/Ethnicity    | 44 |              |
| Latino            |    | 11% ( 5)     |
| White             |    | 89% (39)     |
| AXL index score   | 53 |              |
| 0                 |    | 13% ( 7)     |
| 1                 |    | 21% (11)     |
| 2                 |    | 11% ( 6)     |
| 3                 |    | 55% (29)     |
| AXL               | 53 |              |
| <2                |    | 34% (18)     |
| ≥2                |    | 66% (35)     |
| c-ABL index score | 53 |              |
| 0                 |    | 6% ( 3)      |
| 2                 |    | 8% ( 4)      |
| 4                 |    | 21% (11)     |
| 8                 |    | 26% (14)     |
| 12                |    | 40% (21)     |
| c-ABL             | 53 |              |
| <8                |    | 34% (18)     |
| ≥8                |    | 66% (35)     |
| Location          | 53 |              |
| distal esophagus  |    | 4% ( 2)      |
| Esophagus         |    | 51% (27)     |
| G-E Junction      |    | 45% (24)     |
| Tumor size (cm)   | 52 | 1.0 2.5 4.0  |
| Tumor categories  | 52 |              |
| <3cm              |    | 48% (25)     |
| ≥3cm              |    | 52% (27)     |
| Barrett's         | 27 |              |
| Yes               |    | 93% (25)     |
| No                |    | 7% ( 2)      |
| Surgery performed | 49 |              |
| Yes               |    | 22% (11)     |
| No                |    | 78% (38)     |

N, number of patients. Numbers after proportions are frequencies. *a b c* represent the lower quartile *a*, the median *b*, and the upper quartile *c* for continuous variables.

**Supplemental Table S2: (continued)**

|                           | N  |     |      |
|---------------------------|----|-----|------|
| Tumor core histology      | 51 |     |      |
| Diffuse                   |    | 8%  | ( 4) |
| Intestinal                |    | 73% | (37) |
| mixed                     |    | 4%  | ( 2) |
| Papillary                 |    | 2%  | ( 1) |
| poorly diff               |    | 4%  | ( 2) |
| Signet-Ring               |    | 8%  | ( 4) |
| well diff                 |    | 2%  | ( 1) |
| Differentiation           | 49 |     |      |
| intestinal                |    | 6%  | ( 3) |
| Moderately-differentiated |    | 49% | (24) |
| Mod-poorly differentiated |    | 18% | ( 9) |
| Poorly differentiated     |    | 18% | ( 9) |
| Well-differentiated       |    | 8%  | ( 4) |
| Lymph Nodes               | 53 |     |      |
| Negative                  |    | 38% | (20) |
| Positive                  |    | 62% | (33) |
| Stage                     | 53 |     |      |
| 0                         |    | 9%  | ( 5) |
| 1                         |    | 30% | (16) |
| 2                         |    | 38% | (20) |
| 3                         |    | 21% | (11) |
| 4                         |    | 2%  | ( 1) |
| N Classification          | 53 |     |      |
| N0                        |    | 49% | (26) |
| N1                        |    | 19% | (10) |
| N2                        |    | 32% | (17) |
| T Classification          | 53 |     |      |
| T1                        |    | 51% | (27) |
| T2                        |    | 26% | (14) |
| T3                        |    | 17% | ( 9) |
| T4                        |    | 6%  | ( 3) |
| Number Positive Nodes     | 51 |     |      |
| 0                         |    | 47% | (24) |
| 1                         |    | 24% | (12) |
| 2                         |    | 10% | ( 5) |
| 3                         |    | 6%  | ( 3) |
| 4                         |    | 4%  | ( 2) |
| 5                         |    | 2%  | ( 1) |
| 6                         |    | 4%  | ( 2) |
| 7                         |    | 2%  | ( 1) |

N, number of patients. Numbers after proportions are frequencies. *a b c* represent the lower quartile *a*, the median *b*, and the upper quartile *c* for continuous variables.

**Supplemental Table S2: (continued)**

|                              | N  |              |
|------------------------------|----|--------------|
| 8                            |    | 2% ( 1)      |
| Number Total Nodes           | 50 | 5 8 14       |
| Cancer recurrence            | 53 | <i>a b c</i> |
| Yes                          |    | 96% (51)     |
| No                           |    | 4% ( 2)      |
| Recurrence after chemo       | 53 |              |
| Yes                          |    | 100% (53)    |
| No                           |    | 0% ( 0)      |
| Recurrence Free Survival     | 53 | 114 845 1890 |
| location.of.tumor.recurrence | 27 | <i>a b c</i> |
| anastamosis                  |    | 4% (1)       |
| Bone                         |    | 4% (1)       |
| Brain                        |    | 7% (2)       |
| Esophagus                    |    | 4% (1)       |
| Femur                        |    | 4% (1)       |
| Liver                        |    | 11% (3)      |
| Lung                         |    | 7% (2)       |
| Lymph node (supraclavicular) |    | 4% (1)       |
| Mediastinum                  |    | 7% (2)       |
| NA                           |    | 19% (5)      |
| Neck                         |    | 4% (1)       |
| Perirenal                    |    | 4% (1)       |
| Pleura                       |    | 15% (4)      |
| Ribs                         |    | 4% (1)       |
| Stomach                      |    | 4% (1)       |
| Died of cancer               | 53 |              |
| Yes                          |    | 100% (53)    |
| No                           |    | 0% ( 0)      |
| Follow-up period             | 53 | 45 450 1740  |
| Recurrence survival days     | 53 | 114 845 1890 |
| Post Op CT                   | 34 | <i>a b c</i> |
| Yes                          |    | 41% (14)     |
| No                           |    | 59% (20)     |

N, number of patients. Numbers after proportions are frequencies. *a b c* represent the lower quartile *a*, the median *b*, and the upper quartile *c* for continuous variables.

**Supplemental Table S3. List of quantitative real-time PCR primers sequences**

|                         |                                     |
|-------------------------|-------------------------------------|
| <i>HPRT1 (forward)</i>  | 5'-ACCCTTTCCAAATCCTCAGC-3'          |
| <i>HPRT1 (reverse)</i>  | 5'-GTTATGGCGACCCGCAG-3'             |
| <i>AXL (forward)</i>    | 5'-GAAGGTACCATGACAACCCAGGCAAAGTG-3' |
| <i>AXL (reverse)</i>    | 5'-GAACTCGAGACGCCATGGGTGCCAAAC-3'   |
| <i>ABL1 (forward)</i>   | 5'-AAGCCGCTCGTTGGAATC-3'            |
| <i>ABL1 (reverse)</i>   | 5'-AGACCCGGAGCTTTTCACCT-3'          |
| <i>EIF4E1 (forward)</i> | 5'-GAAACCACCCCTACTCCTAATCC-3'       |
| <i>EIF4E1 (reverse)</i> | 5'-AGAGTGCCCATCTGTTCTGTA-3'         |
| <i>EIF4E2 (forward)</i> | 5'-ACAACAAGTTCGACGCTTTGA-3'         |
| <i>EIF4E2 (reverse)</i> | 5'-TCTCTTGCTACTGCTCTGATTCT-3'       |
| <i>EIF4E3 (forward)</i> | 5'-GAGTTAGTGTTCAGTGTTCGGG-3'        |
| <i>EIF4E3 (reverse)</i> | 5'-TGTGGGGCAGAAGTTCATAGA-3'         |

## **Cell culture and reagents**

The human EAC cancer cell line, SK-GT-4, was purchased from Sigma-Aldrich (St. Louis, MO, USA). SK-GT-4 cells were cultured in Dulbecco's modified Eagle's medium (DMEM; GIBCO, Carlsbad, CA, USA) supplemented with 5% fetal bovine serum (FBS, Invitrogen Life technologies, Carlsbad, CA, USA) and 1% penicillin/streptomycin (GIBCO). CP-A and CP-B cells were obtained from ATCC (Manassas, VA, USA) and BAR-T cells [1] were cultured in DMEM/F12 medium supplemented with 0.4  $\mu\text{g/ml}$  hydrocortisone, 20 ng/ml recombinant human epidermal growth factor, 20 mg/ml adenine, 140  $\mu\text{g/ml}$  bovine pituitary extract, 0.1% ITS Supplement (Sigma-Aldrich; I1884), 4 mM glutamine, and 5% FBS. EPC2 cells were kindly provided by Dr. Hiroshi Nakagawa (University of Pennsylvania, Philadelphia, PA, USA) and cultured in keratinocyte serum-free medium supplemented with 40 mg/ml bovine pituitary extract and 1 ng/ml EGF (Invitrogen). HEK-293 were obtained from ATCC and maintained in F12 (HAM) medium (GIBCO) supplemented with 10% FBS and 1% penicillin/streptomycin. All cell lines were authenticated using short tandem repeat (STR) profiling (Genetica DNA Laboratories, Burlington, NC, USA). Cycloheximide was purchased from Sigma-Aldrich.

## **c-ABL protein stability assay**

HEK-293 cells were transiently co-transfected with Flag-ABL1 in combination with AXL-Myc-His or pcDNA3 plasmids and cultured for 24 h. The cells were then treated with 80  $\mu\text{g/ml}$  of cycloheximide (CHX) and harvested at 0-, 2-, 6-, 8-, and 24-hour time points. Proteins from each time point were prepared and analyzed by Western blotting to evaluate c-ABL protein



stability. The mean intensity of protein bands was analyzed by densitometry using IMAGEJ (NIH Image) and normalized to  $\beta$ -actin.

## References

- 1 Jaiswal KR, Morales CP, Feagins LA, Gandia KG, Zhang X, Zhang HY *et al.* Characterization of telomerase-immortalized, non-neoplastic, human Barrett's cell line (BAR-T). *Dis Esophagus* 2007; 20: 256-264.
